# Supplementary material for: Evolution of the Prevalence, Clinical Features and Risk Factors for Acute Mountain Sickness in the Qinghai-Tibet Plateau
Source: Research Square preprint supplement (doi:10.21203/rs.3.rs-663450/v1), 2021-07-13
Supplement: Supplementary file 1 [file 849063d9964f833814861af8.doc]

| **S1 Table. Baseline Demographic Characteristics of the Overall Population and of Subjects in Fast or Slow Ascent Cohort** | | | | | | | | | |
| --- | --- | --- | --- | --- | --- | --- | --- | --- | --- |
|  | **Fast Ascent Cohort** | |  | **Slow Ascent Cohort** | | P1 | P2 | P3 | P4 |
|  | 3700m (n=1283) | 4400m (n=757) |  | 3450m (n=346) | 4100m (n=314) |
| **Age, yrs** | 23.5 ± 4.2 | 23.0 ± 3.8 |  | 21.3 ± 3.1 | 21.3 ± 3.1 | <0.001 | <0.001 | 0.024 | 0.917 |
| **Height, cm** | 171.6 ± 4.8 | 171.7 ± 4.8 |  | 172.1 ± 4.5 | 171.9 ± 4.6 | 0.075 | 0.404 | 0.618 | 0.701 |
| **Weight, kg** | 64.1 ± 7.4 | 64.1 ± 7.5 |  | 62.9 ± 6.6 | 62.7 ± 6.6 | 0.006 | 0.005 | 0.966 | 0.755 |
| **BMI, kg.m-2** | 21.8 ± 2.2 | 21.7 ± 2.2 |  | 21.2 ± 1.9 | 21.2 ± 1.9 | <0.001 | <0.001 | 0.755 | 0.896 |
| **Smoking** |  |  |  |  |  | <0.001 | 0.006 | 0.488 | 0.989 |
| non | 370 (28.8%) | 211 (27.9%) |  | 104 (30.1%) | 96 (30.6%) |  |  |  |  |
| previous | 213 (16.6%) | 129 (17.0%) |  | 75 (21.7%) | 68 (21.7%) |  |  |  |  |
| current | 651 (50.7%) | 397 (52.4%) |  | 167 (48.3%) | 150 (47.8%) |  |  |  |  |
| unknown | 49 (3.8%) | 20 (2.6%) |  | 0 (0.0%) | 0 (0.0%) |  |  |  |  |
| **Nationality** |  |  |  |  |  | <0.001 | <0.001 | 0.478 | 0.802 |
| Han | 1090 (85.0%) | 628 (83.0%) |  | 302 (87.3%) | 272 (86.6%) |  |  |  |  |
| non-Han | 137 (10.7%) | 93 (12.3%) |  | 44 (12.7%) | 42 (13.4%) |  |  |  |  |
| unknown | 56 (4.4%) | 36 (4.8%) |  | 0 (0.0%) | 0 (0.0%) |  |  |  |  |
| **Education** |  |  |  |  |  | <0.001 | 0.017 | 0.278 | 0.741 |
| university | 247 (19.3%) | 128 (16.9%) |  | 52 (15.0%) | 50 (15.9%) |  |  |  |  |
| high school | 614 (47.9%) | 388 (51.3%) |  | 201 (58.1%) | 181 (57.6%) |  |  |  |  |
| under high school | 378 (29.4%) | 222 (19.5%) |  | 70 (20.2%) | 68 (21.7%) |  |  |  |  |
| unknown | 44 (3.4%) | 19 (2.5%) |  | 23 (6.6%) | 15 (4.8%) |  |  |  |  |
| **History of HA exposure within 1 year** | |  |  |  |  | <0.001 | <0.001 | 0.041 | 0.477 |
| no | 612 (47.7%) | 381 (50.3%) |  | 267 (77.2%) | 247 (78.7%) |  |  |  |  |
| yes | 257 (20.0%) | 171 (22.6%) |  | 38 (11.0%) | 26 (8.3%) |  |  |  |  |
| unknown | 414 (32.3%) | 205 (27.1%) |  | 41 (11.8%) | 41 (13.1%) |  |  |  |  |
| Values are Mean ± SD or n (%). BMI = Body Mass Index. P1 value for comparison between 3700m and 3450m. P2 value for comparison between 4400m and 4100m. P3 value for comparison between 3700m and 4400m. P4 value for comparison between 3450m and 4100m. | | | | | | | | | |

| **S2 Table. Baseline Demographic Characteristics of the Propensity Score-Matched Subjects in Fast or Slow Ascent Cohort** | | | | |
| --- | --- | --- | --- | --- |
|  | **Overall** | **Fast Ascent Cohort** | **Slow Ascent Cohort** | **p Value** |
|  | (n=556) | (n=278) | (n=278) |
| **Age, yrs** | 21.5 ± 3.0 | 21.6 ± 3.0 | 21.3 ± 3.0 | 0.283 |
| **Height, cm** | 171.9 ± 4.6 | 171.8 ± 4.6 | 171.9 ± 4.6 | 0.960 |
| **Weight, kg** | 63.0 ± 6.7 | 63.2 ± 6.8 | 62.8 ± 6.6 | 0.520 |
| **BMI, kg.m-2** | 21.3 ± 2.0 | 21.4 ± 2.0 | 21.3 ± 1.9 | 0.441 |
| **Smoking** |  |  |  | 0.307 |
| non | 152 (27.3%) | 75 (27.0%) | 77 (27.7%) |  |
| previous | 107 (19.2%) | 47 (16.9%) | 60 (21.6%) |  |
| current | 297 (53.4%) | 156 (56.1%) | 141 (50.7%) |  |
| **Nationality** |  |  |  | 1.000 |
| Han | 478 (86.0%) | 239 (86.0%) | 239 (86.0%) |  |
| non-Han | 78 (14.0%) | 39 (14.0%) | 39 (14.0%) |  |
| **Education** |  |  |  | 0.683 |
| university | 79 (14.2%) | 43 (15.5%) | 36 (12.9%) |  |
| high school | 341 (61.3%) | 167 (60.1%) | 174 (62.6%) |  |
| under high school | 136 (24.5%) | 68 (24.5%) | 68 (24.5%) |  |
| **History of HA exposure within 1 year** | |  |  | 0.498 |
| no | 455 (81.8%) | 229 (82.4%) | 226 (81.3%) |  |
| yes | 56 (10.1%) | 30 (10.8%) | 26 ( 9.4%) |  |
| unknown | 45 ( 8.1%) | 19 ( 6.8%) | 26 ( 9.4%) |  |
| Values are Mean ± SD or n (%); Abbreviations as in Table 1; Subjects in the 2 cohorts were matched for all demographic characteristics by using propensity score. | | | | |
|

| **S3 Table. Incidence of Clinical Outcomes According to the Different High Altitudes in the Propensity Score-Matched Cohorts** | | | | | | | | | |
| --- | --- | --- | --- | --- | --- | --- | --- | --- | --- |
|  | **Fast Ascent Cohort** | |  | **Slow Ascent Cohort** | | P1 | P2 | P3 | P4 |
| **3700m, n=278** | **4400m, n=278** |  | **3450m, n=278** | **4100m, n=278** |
| Old LLS-AMS | 181 (65.1%) | 49 (17.6%) |  | 86 (30.9%) | 101 (36.3%) | <0.001 | <0.001 | <0.001 | 0.178 |
| New LLS-AMS | 146 (52.5%) | 36 (12.9%) |  | 74 (26.6%) | 89 (32.0%) | <0.001 | <0.001 | <0.001 | 0.162 |
| Headache | 206 (74.1%) | 61 (21.9%) |  | 127 (45.7%) | 139 (50.0%) | <0.001 | <0.001 | <0.001 | 0.308 |
| Dizziness | 197 (70.9%) | 58 (20.9%) |  | 144 (51.8%) | 145 (52.2%) | <0.001 | <0.001 | <0.001 | 0.932 |
| GI upset | 54 (19.4%) | 22 (7.9%) |  | 37 (13.3%) | 24 (8.6%) | 0.051 | 0.758 | <0.001 | 0.078 |
| Insomnia | 170 (61.2%) | 86 (30.9%) |  | 55 (19.8%) | 62 (22.3%) | <0.001 | 0.021 | <0.001 | 0.466 |
| Fatigue | 184 (66.2%) | 93 (33.5%) |  | 107 (38.5%) | 135 (48.6%) | <0.001 | <0.001 | <0.001 | 0.017 |
| Paraesthesia | 115 (41.4%) | 39 (14.0%) |  | 80 (28.8%) | 80 (28.8%) | 0.002 | <0.001 | <0.001 | 1 |
| Constipation | 22 (7.9%) | 23 (8.3%) |  | 37 (13.3%) | 38 (13.7%) | 0.039 | 0.042 | 0.876 | 0.901 |
| Dyspnea | 78 (28.1%) | 60 (21.6%) |  | 22 (7.9%) | 54 (19.4%) | <0.001 | 0.529 | 0.077 | <0.001 |
| Cough | 40 (14.4%) | 41 (14.7%) |  | 22 (7.9%) | 56 (20.1%) | 0.015 | 0.094 | 0.904 | <0.001 |
| Chest distress | 103 (37.1%) | 55 (19.8%) |  | 54 (19.4%) | 56 (20.1%) | <0.001 | 0.916 | <0.001 | 0.831 |
| Palpitation | 38 (13.7%) | 19 (6.8%) |  | 25 (9.0%) | 29 (10.4%) | 0.082 | 0.131 | 0.008 | 0.567 |
| Tinnitus | 58 (20.9%) | 20 (7.2%) |  | 60 (21.6%) | 47 (16.9%) | 0.836 | <0.001 | <0.001 | 0.162 |
| Dazzling | 33 (11.9%) | 17 (6.1%) |  | 23 ( 8.3%) | 28 (10.1%) | 0.159 | 0.087 | 0.018 | 0.463 |
| Lethargy | 77 (27.7%) | 38 (13.7%) |  | 39 (14.0%) | 37 (13.3%) | <0.001 | 0.901 | <0.001 | 0.805 |
| Activity reduction | 172 (61.9%) | 112 (40.3%) |  | 70 (25.2%) | 108 (38.8%) | <0.001 | 0.729 | <0.001 | <0.001 |
| Values are n (%); Abbreviations as in Table 1 and Table 2. P1 value for comparison between 3700m and 3450m. P2 value for comparison between 4400m and 4100m. P3 value for comparison between 3700m and 4400m. P4 value for comparison between 3450m and 4100m. | | | | | | | | | |

| **S4 Table. Risk Factors of LLS-AMS at Different High Altitudes in the Propensity Score-Matched Cohorts after Univariate Analysis** | | | | | |
| --- | --- | --- | --- | --- | --- |
|  | **Old LLS-AMS** | |  | **New LLS-AMS** | |
|  | **3700m/3450m** | **4400m/4100m** |  | **3700m/3450m** | **4400m/4100m** |
| **Age, yrs** | 1.0 (1.0, 1.1) | 1.0 (0.9, 1.0) |  | 1.0 (1.0, 1.1) | 1.0 (0.9, 1.0) |
| **BMI, Kg.m-2** | 1.0 (0.9, 1.0) | 1.0 (0.9, 1.1) |  | 1.0 (0.9, 1.1) | 1.0 (0.9, 1.1) |
| **Smoking** |  |  |  |  |  |
| Non | 1 | 1 |  | 1 | 1 |
| Previous | 0.9 (0.5, 1.4) | 1.1 (0.6, 1.9) |  | 1.1 (0.6, 1.8) | 1.4 (0.8, 2.6) |
| Current | 0.9 (0.6, 1.3) | 1.4 (0.9, 2.2) |  | 1.0 (0.7, 1.6) | 1.6 (1.0, 2.7) |
| **Nationality** |  |  |  |  |  |
| Han | 1 | 1 |  | 1 | 1 |
| non-Han | 0.6 (0.3, 0.9) * | 0.5 (0.3, 0.9) * |  | 0.7 (0.4, 1.1) | 0.4 (0.2, 0.9) * |
| **Education** |  |  |  |  |  |
| university | 1 | 1 |  | 1 | 1 |
| high school | 0.9 (0.6, 1.5) | 1.5 (0.9, 2.8) |  | 1.0 (0.6, 1.6) | 1.6 (0.8, 3.0) |
| under high school | 1.0 (0.6, 1.7) | 1.1 (0.6, 2.2) |  | 1.2 (0.7, 2.1) | 1.5 (0.7, 3.1) |
| **History of HA exposure** | |  |  |  |  |
| No | 1 | 1 |  | 1 | 1 |
| Yes | 1.2 (0.7, 2.2) | 1.1 (0.6, 2.0) |  | 1.4 (0.8, 2.5) | 0.8 (0.4, 1.7) |
| Unknown | 0.6 (0.3, 1.2) | 1.1 (0.6, 2.2) |  | 0.6 (0.3, 1.1) | 1.0 (0.5, 2.0) |
| Values are β/OR (95%CI); * means p-value <0.05, and **means p-value <0.01. Other abbreviations as in Table 1 and Table 2. | | | | | |
